# Supplementary material for: Integrated computational and experimental design of copper–gallic acid nanozymes for selective salbutamol detection
Source: Royal Society of Chemistry journal article supplement (doi:10.1039/d5me00136f), 2025-11-14
Supplement: d5me00136f1.pdf [file d5me00136f1.pdf]

**Supplementary Material**

**Integrated Computational and Experimental Design of Copper–Gallic Acid Nanozymes  
for Selective Salbutamol Detection**

Fatemeh Parad<sup>a</sup>, Fahimeh Ghasemi<sup>b</sup>, Parisa Khadiv-Parsi<sup>c</sup>, Haider Al Amili<sup>a</sup>, Parna  
Keramati<sup>a</sup>, Somayeh Mojtavavi<sup>a,\*</sup>, and Mohammad Ali Faramarzi<sup>a,\*</sup>

*<sup>a</sup> Department of Pharmaceutical Biotechnology, Faculty of Pharmacy & Biotechnology  
Research Center, Tehran University of Medical Sciences, P.O. Box 14155–6451, Tehran  
1417614411, Iran*

*<sup>b</sup> Department of Medical Biotechnology, School of Advanced Technologies in Medicine,  
Tehran University of Medical Sciences, Tehran, Iran*

*<sup>c</sup> School of Chemical Engineering, College of Engineering, University of Tehran, Tehran,  
Iran*

-----  
\* Corresponding authors: S. Mojtavavi, Telefax: +98-21-66954712, E-mail:  
smojtabavi@tums.ac.ir; M.A. Faramarzi, Telefax: +98-21-66954712, E-mail:  
faramarz@tums.ac.ir

### *S1. FTIR and XRD characterization*

In the FTIR spectrum of GA, the bands observed in the range of 4000–3000  $\text{cm}^{-1}$  with a strong and narrow peak at 1701  $\text{cm}^{-1}$  were attributed to the stretching vibration of the hydroxyl (OH) group and the carbonyl (C=O) group, respectively. The peaks at 1620, 1540, and 1451  $\text{cm}^{-1}$  were characteristic of the stretching vibrations of the carbon-carbon (C-C) bonds within the aromatic ring of GA. Several other peaks observed in the range of 1300–1000  $\text{cm}^{-1}$  corresponded to the stretching vibrations of the carbon-oxygen (C-O) bond and the bending vibration of the hydroxyl (O-H) bond of GA. The FTIR spectrum of HSs exhibited a notable increase in intensity and a shift in the position of the peaks associated with hydroxyl groups (Fig. S1). This observation further supports the formation of the metal-ligand bonds (605  $\text{cm}^{-1}$  and 511  $\text{cm}^{-1}$ ) involving the hydroxyl groups of GA. X-ray diffraction analysis of GA showed a crystalline nature, characterized by the presence of sharp diffraction peaks at specific angles, including 20.12°, 24.9°, 28.11°, and 41.5°. The prepared HSs exhibited similar diffraction peaks to those observed for GA. However, reduced intensity and broadened peaks suggested a decrease in the crystallinity of this organic acid within the nanozymes (Fig. S2).

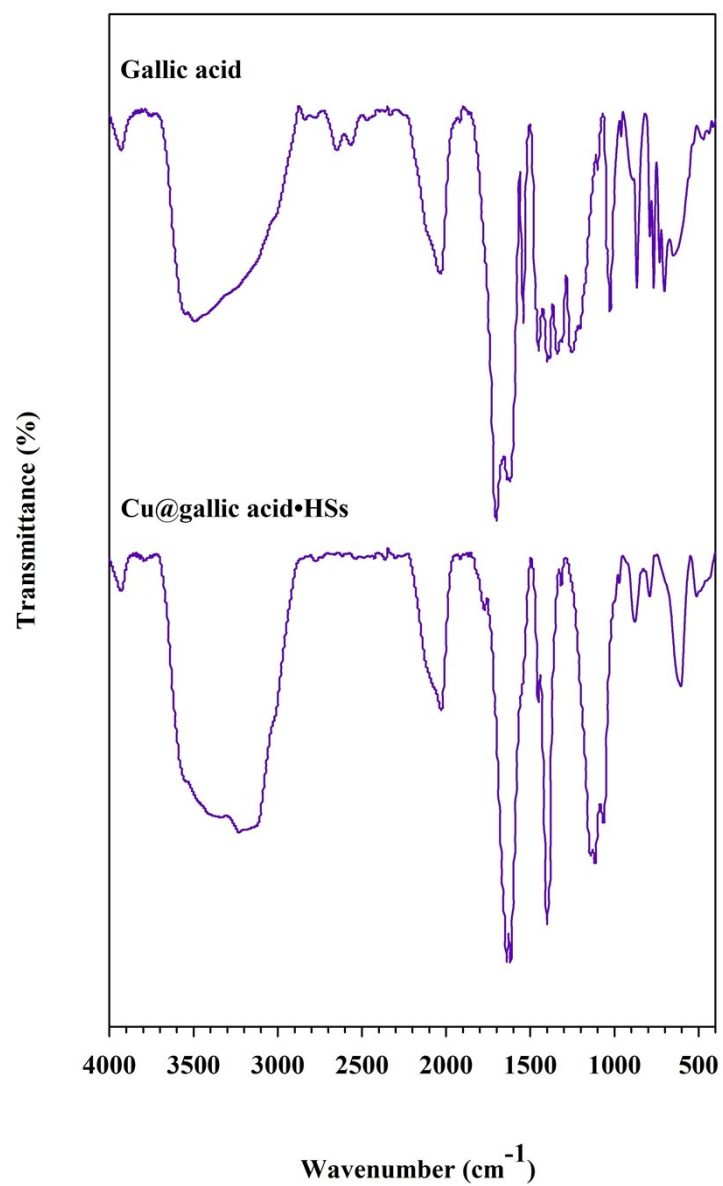

**Figure S1.** FTIR spectra of gallic acid and the prepared copper@gallic acid hybrid structures (Cu@GA•HSs).

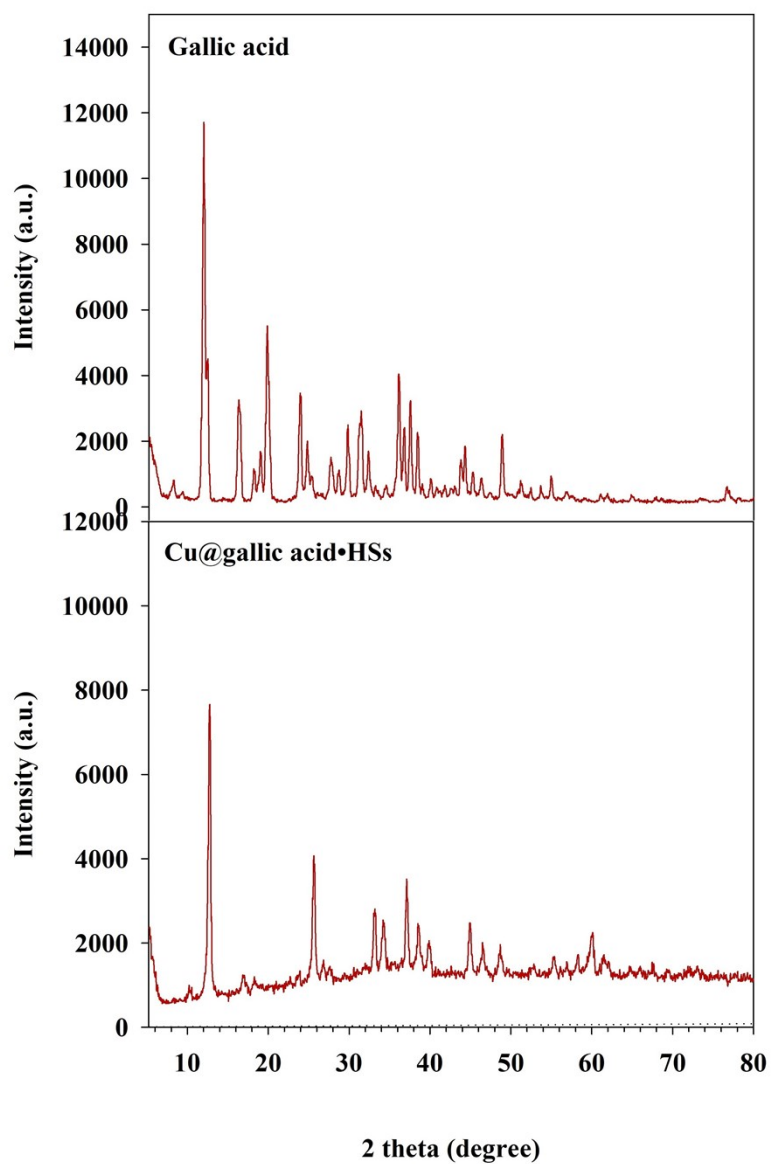

**Figure S2.** XRD patterns of gallic acid and copper@gallic acid hybrid structures (Cu@GA•HSs).

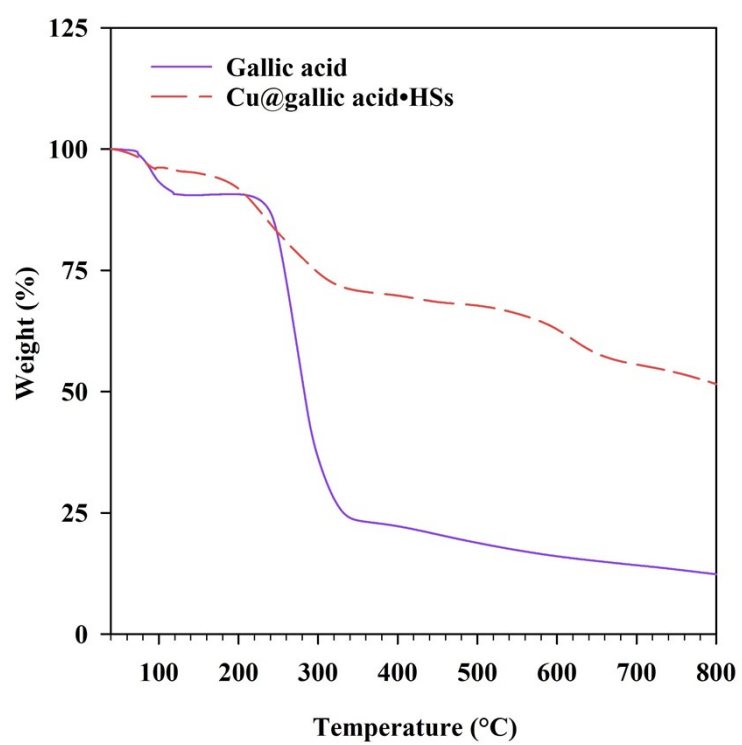

**Figure S3.** Thermogravimetric analysis (TGA) curves of gallic acid and Cu@gallic acid•HSs.

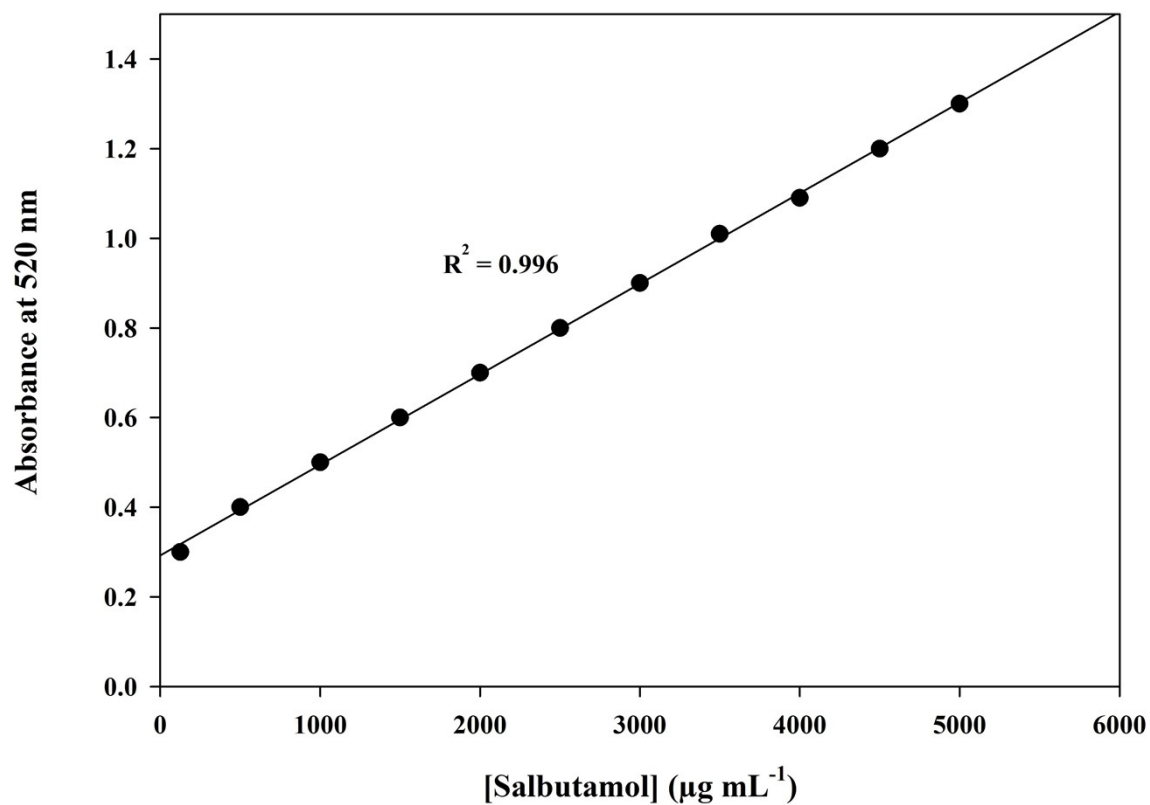

**Figure S4.** Calibration curve showing the relationship between salbutamol concentration and absorbance, obtained using a copper@gallic acid hybrid structure (Cu@GA•HSs)-based assay in Britton-Robinson (BR) buffer containing 4-aminoantipyrine (4-AP) at 50 °C.

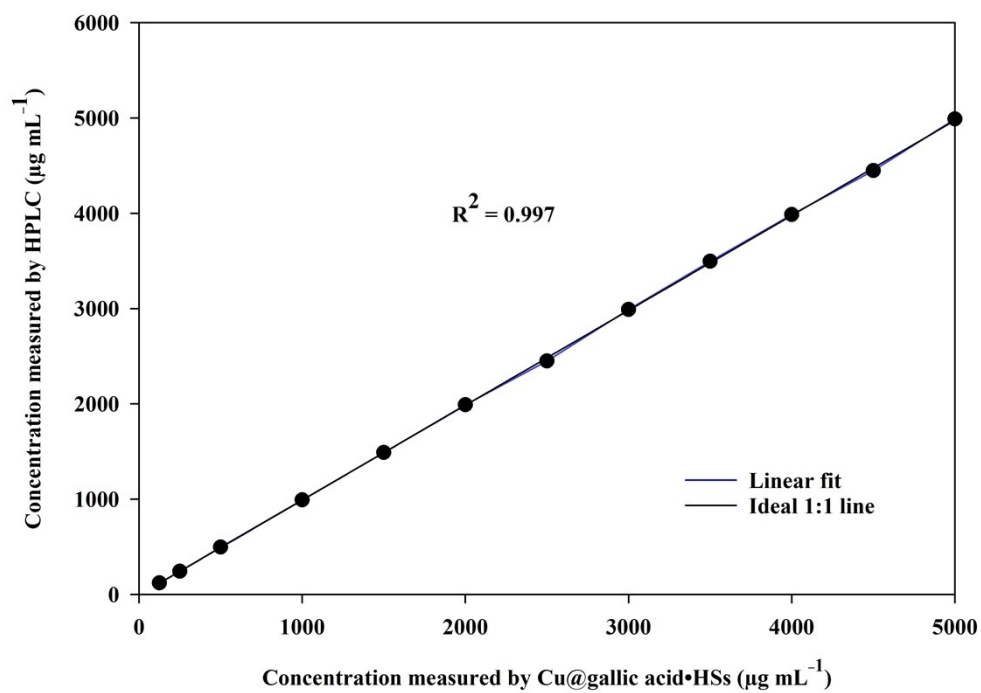

**Figure S5.** Correlation curve comparing the analytical response from copper@gallic acid hybrid structures (Cu@GA•HSs) with High-Performance Liquid Chromatography (HPLC) signals for the measurement of salbutamol concentration.
